# Supplementary material for: Rapid O 3 assimilations – Part 1: Background and local contributions to tropospheric O 3 changes in China in 2015–2020
Source: Copernicus journal article supplement (doi:10.5194/gmd-16-6337-2023), 2023-11-08
Supplement: Supplementary file 1 [file gmd-16-6337-2023-supplement.pdf]

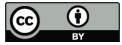

*Supplement of*

## **Rapid O<sub>3</sub> assimilations – Part 1: Background and local contributions to tropospheric O<sub>3</sub> changes in China in 2015–2020**

**Rui Zhu et al.**

*Correspondence to:* Zhe Jiang (zhejiang@ustc.edu.cn)

The copyright of individual parts of the supplement might differ from the article licence.

# Supplemental Information

## Uncertainty Analysis

The uncertainties in the averages of surface and tropospheric column O<sub>3</sub> concentrations are calculated using the bootstrapping method (Efron, 1992):

1. A bootstrap sample is generated by randomly drawing N data points from the full set of N data points. For example, the OMI O<sub>3</sub> data was averaged to produce a dataset with 1868 points (grids with 0.5°×0.625° spatial resolution over China); N = 1868 data points were then randomly drawn from the dataset (individual data points may be drawn multiple times); Average of OMI O<sub>3</sub> over China (for example, 2015) is calculated as the mean value of the randomly drawn N = 1868 data points.
2. Step 1 are repeated by 1000 times. Because the averages are based on the randomly drawn data points, we have different averages for the same year (for example, 2015). The standard deviation of the ensemble of averages represent the uncertainty in the average.
3. The above process is repeated to produce the standard deviations of averages of OMI O<sub>3</sub> over China for various years (i.e. 2016, 2017, 2018, 2019 and 2020).

The trends and uncertainties in the trends of surface and tropospheric column O<sub>3</sub> concentrations are calculated using the linear fitting of averages by using the least squares method.

Reference:

Efron, B.: Bootstrap Methods: Another Look at the Jackknife. In: Kotz, S., Johnson, N.L. (eds) Breakthroughs in Statistics. Springer Series in Statistics. Springer, New York, NY, 1992.

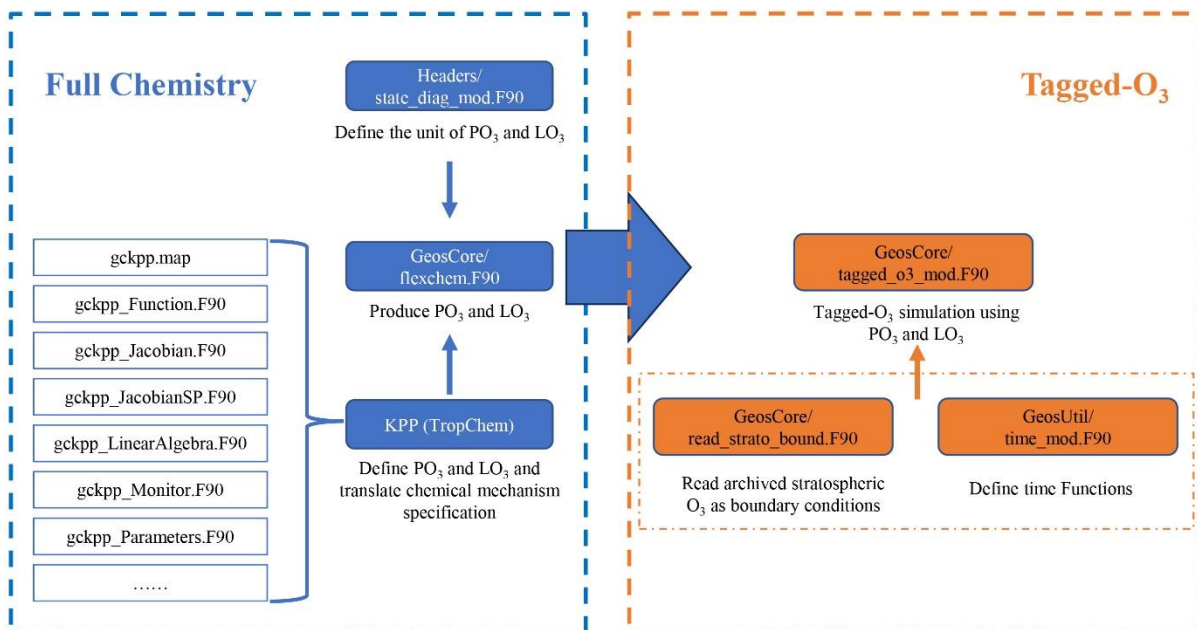

**Fig. S1.** Framework of the tagged-O<sub>3</sub> mode of GEOS-Chem.

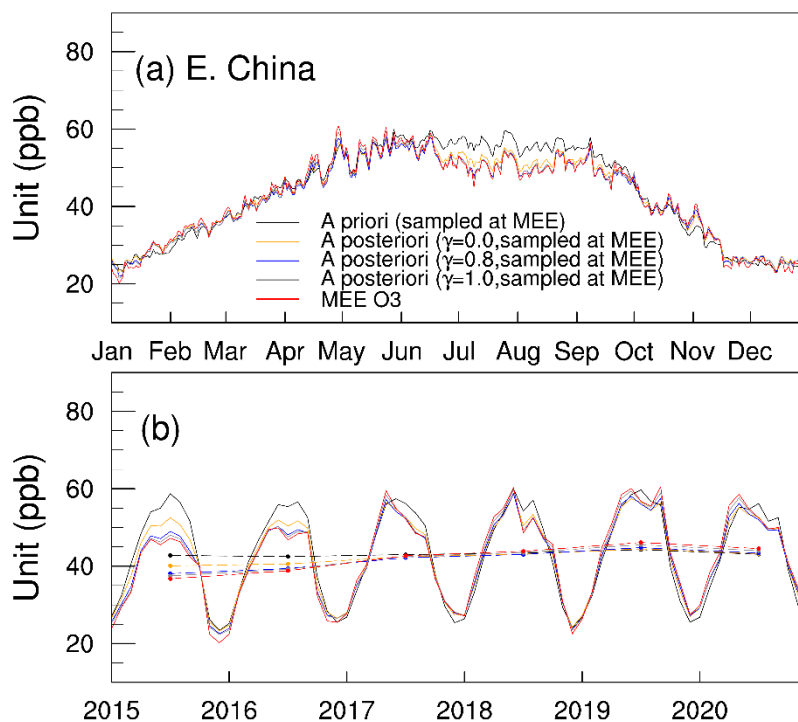

**Fig. S2.** (a) Daily averages of surface MDA8 O<sub>3</sub> in 2015-2020 from MEE stations, GEOS-Chem a priori and a posteriori simulations by assimilating MEE O<sub>3</sub> observations with different  $\gamma$  parameters (experiments #5-#7 in Table 1). (b) Monthly averages of MDA8 O<sub>3</sub>. The dashed lines in panel b are annual averages.

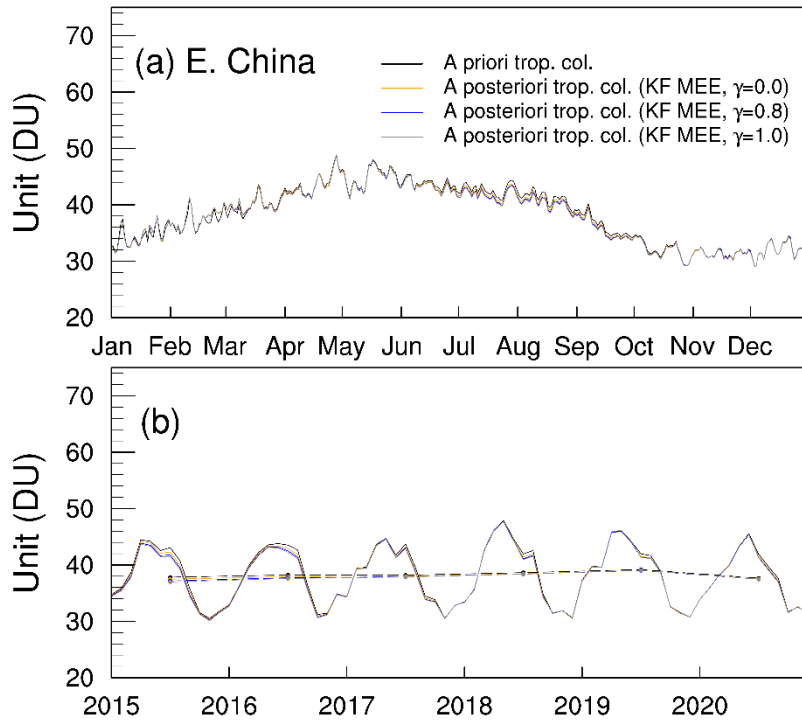

**Fig. S3.** (a) Daily averages of tropospheric O<sub>3</sub> columns in 2015-2020 from GEOS-Chem a priori simulation and a posteriori simulations by assimilating MEE O<sub>3</sub> observations with different  $\gamma$  parameters (experiments #5-#7 in Table 1). (b) Monthly averages of tropospheric O<sub>3</sub> columns. The dashed lines in panel b are annual averages.

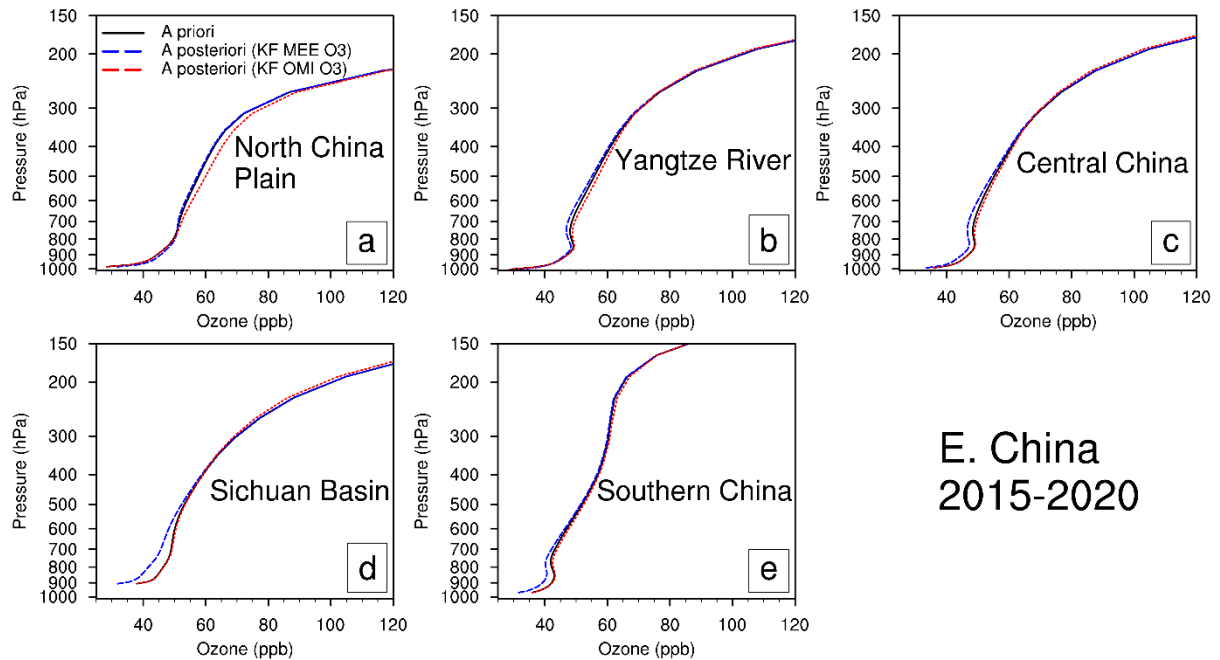

**Fig. S4.** Averages of O<sub>3</sub> vertical profiles in 2015-2020 from GEOS-Chem a priori (black) and a posteriori simulations by assimilating MEE (blue) and OMI (red) O<sub>3</sub> observations.

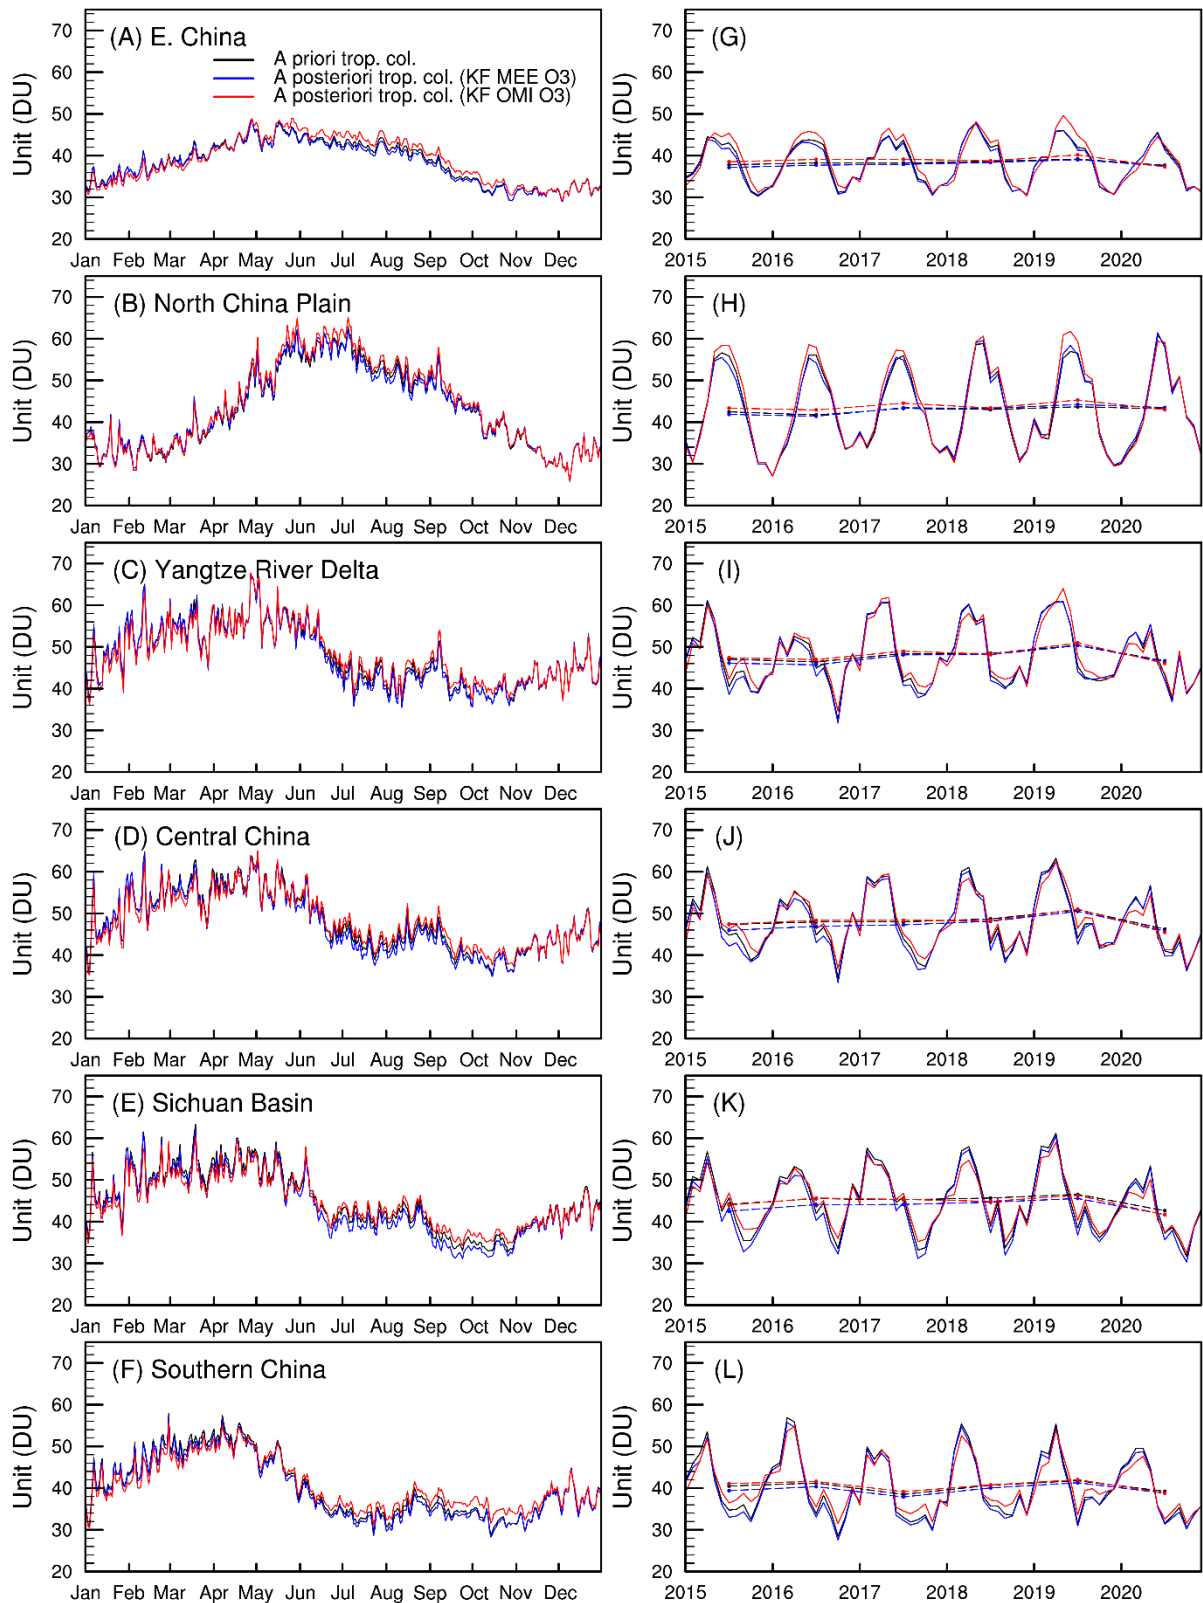

**Fig. S5.** (A-F) Daily averages of tropospheric O<sub>3</sub> columns in 2015-2020 from GEOS-Chem a priori simulation (black, Exp. #1) and a posteriori simulations by assimilating MEE (blue, Exp. #5) and OMI (red, Exp. #8) O<sub>3</sub> observations. (G-L) Monthly averages of tropospheric O<sub>3</sub> columns. The dashed lines in panels G-L are annual averages. The output O<sub>3</sub> profiles are NOT convolved with OMI averaging kernels.

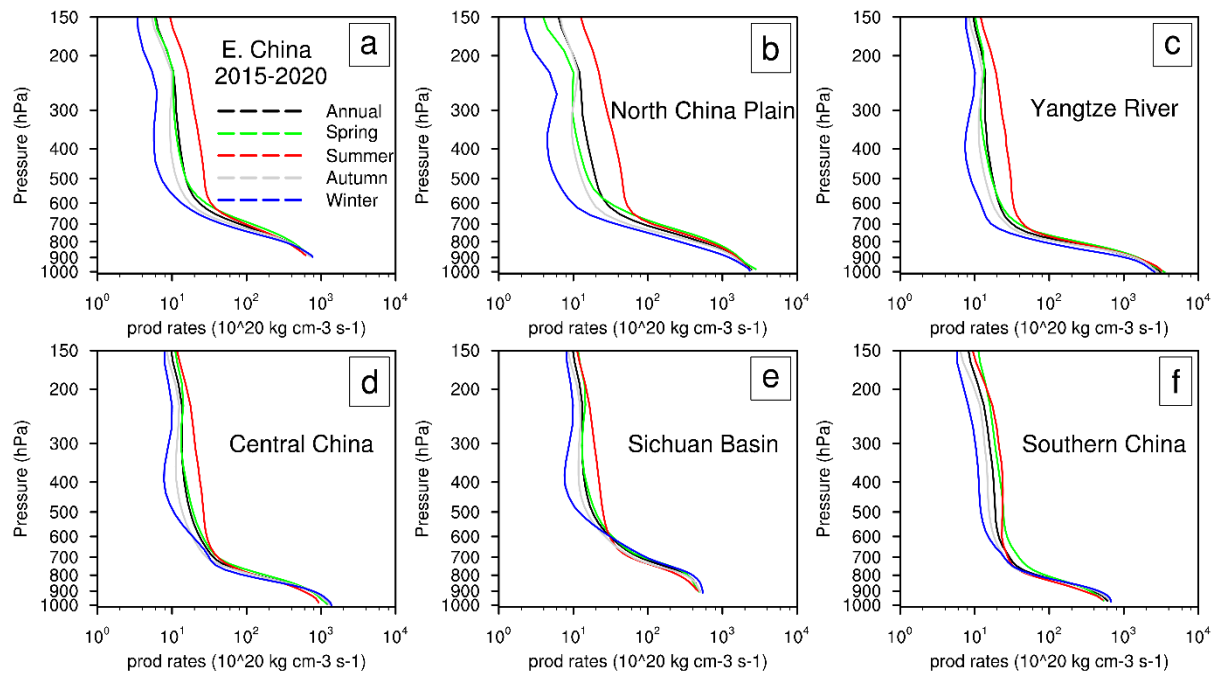

**Fig. S6.** O<sub>3</sub> production rates in 2015-2020 from GEOS-Chem simulations.

| #1 North China Plain<br>(2015-2020)  |          | Annual   |            | Spring   |            | Summer   |            | Autumn   |            | Winter   |            |
|--------------------------------------|----------|----------|------------|----------|------------|----------|------------|----------|------------|----------|------------|
|                                      |          | Mean     | Trend      |
| TS1.1 surface<br>(sampled)           | MEE      | 47.6±0.4 | 2.34±0.48  | 55.7±0.4 | 2.41±0.63  | 65.2±0.7 | 3.00±0.88  | 42.9±0.5 | 2.29±0.47  | 27.8±0.4 | 1.35±0.24  |
|                                      | a priori | 42.4±0.2 | 0.49±0.10  | 46.0±0.3 | 0.55±0.11  | 65.5±0.3 | 0.68±0.33  | 36.0±0.3 | 0.61±0.19  | 22.4±0.2 | 0.34±0.18  |
|                                      | KF-MEE   | 45.6±0.2 | 1.76±0.35  | 51.7±0.3 | 1.94±0.44  | 63.5±0.5 | 2.52±0.73  | 40.8±0.5 | 1.72±0.31  | 27.2±0.2 | 0.81±0.15  |
| TS1.2<br>surface                     | a priori | 42.7±0.2 | 0.48±0.10  | 46.2±0.2 | 0.53±0.11  | 66.3±0.3 | 0.69±0.34  | 36.0±0.3 | 0.60±0.22  | 22.5±0.1 | 0.34±0.20  |
|                                      | KF-MEE   | 44.8±0.2 | 1.56±0.32  | 50.5±0.3 | 1.70±0.34  | 64.1±0.4 | 2.33±0.70  | 39.3±0.4 | 1.53±0.32  | 25.9±0.2 | 0.76±0.16  |
| TS1.3<br>trop. column<br>(convolved) | OMI      | 45.2±0.3 | -0.48±0.22 | 46.6±0.4 | 0.08±0.46  | 59.1±0.3 | -1.12±0.46 | 42.7±0.4 | -0.69±0.39 | 32.0±0.3 | -0.69±0.39 |
|                                      | a priori | 40.9±0.2 | 0.04±0.12  | 41.5±0.4 | 0.20±0.32  | 53.8±0.2 | -0.30±0.17 | 38.3±0.2 | 0.21±0.13  | 30.0±0.2 | 0.00±0.19  |
|                                      | KF-OMI   | 42.7±0.2 | -0.20±0.15 | 43.3±0.4 | 0.08±0.24  | 57.0±0.2 | -0.72±0.31 | 40.0±0.3 | -0.16±0.22 | 30.3±0.2 | -0.13±0.19 |
| TS1.4<br>trop. Column                | a priori | 42.9±0.3 | 0.27±0.13  | 44.6±0.5 | -0.09±0.73 | 54.5±0.2 | 0.12±0.16  | 39.5±0.2 | 0.74±0.53  | 33.4±0.6 | 0.64±0.71  |
|                                      | KF-MEE   | 42.9±0.3 | 0.47±0.17  | 45.1±0.4 | 0.14±0.73  | 53.8±0.2 | 0.47±0.10  | 39.6±0.3 | 0.91±0.48  | 33.7±0.5 | 0.70±0.70  |
|                                      | KF-OMI   | 43.7±0.3 | 0.12±0.25  | 45.8±0.3 | -0.19±0.75 | 56.2±0.2 | -0.11±0.24 | 40.3±0.2 | 0.50±0.49  | 33.2±0.5 | 0.52±0.68  |

**Table. S1.** Averages (with units ppb or DU) and trends (with units ppb yr<sup>-1</sup> or DU yr<sup>-1</sup>) of surface and tropospheric column O<sub>3</sub> concentrations in 2015-2020 over North China Plain (Region #1) from observations (MEE and OMI) and a priori and a posteriori (KF) simulations. Grids with low and medium anthropogenic NO<sub>x</sub> emissions are excluded in North China Plain.

| #2 Yangtze River Delta (2015-2020) |          | Annual   |            | Spring   |           | Summer   |            | Autumn   |            | Winter   |            |
|------------------------------------|----------|----------|------------|----------|-----------|----------|------------|----------|------------|----------|------------|
|                                    |          | Mean     | Trend      | Mean     | Trend     | Mean     | Trend      | Mean     | Trend      | Mean     | Trend      |
| TS2.1 surface (sampled)            | MEE      | 44.9±0.6 | 2.01±0.43  | 52.3±0.8 | 2.84±0.75 | 55.6±0.8 | 1.84±1.08  | 44.6±0.5 | 2.65±0.81  | 28.1±0.6 | 0.53±0.54  |
|                                    | a priori | 44.6±0.3 | 0.65±0.12  | 49.2±0.4 | 0.92±0.21 | 60.8±0.6 | 0.63±0.57  | 42.6±0.4 | 0.94±0.17  | 26.3±0.4 | 0.37±0.27  |
|                                    | KF-MEE   | 45.0±0.5 | 1.38±0.33  | 50.7±0.6 | 2.21±0.58 | 56.2±0.7 | 1.34±0.89  | 44.6±0.4 | 1.84±0.55  | 28.9±0.3 | 0.13±0.41  |
| TS2.2 surface                      | a priori | 44.7±0.2 | 0.64±0.12  | 49.4±0.3 | 0.91±0.20 | 60.2±0.6 | 0.54±0.56  | 42.8±0.4 | 0.93±0.18  | 26.9±0.4 | 0.40±0.26  |
|                                    | KF-MEE   | 44.9±0.4 | 1.28±0.31  | 50.6±0.5 | 2.07±0.53 | 55.9±0.7 | 1.15±0.83  | 44.5±0.3 | 1.71±0.51  | 29.1±0.3 | 0.19±0.38  |
| TS2.3 trop. column (convolved)     | OMI      | 48.6±0.2 | -0.29±0.33 | 55.0±0.3 | 0.15±0.54 | 53.6±0.5 | 0.23±0.90  | 45.0±0.2 | -1.08±0.57 | 40.2±0.3 | -1.03±0.91 |
|                                    | a priori | 45.5±0.1 | 0.38±0.22  | 53.4±0.3 | 0.46±0.37 | 48.6±0.6 | 0.52±0.60  | 40.4±0.2 | -0.21±0.30 | 39.3±0.4 | 0.34±0.65  |
|                                    | KF-OMI   | 47.0±0.1 | 0.10±0.28  | 53.9±0.2 | 0.27±0.19 | 51.9±0.5 | 0.33±0.86  | 43.1±0.2 | -0.71±0.43 | 38.8±0.2 | 0.02±0.70  |
| TS2.4 trop. Column                 | a priori | 47.9±0.2 | 0.29±0.37  | 56.4±0.2 | 0.29±1.02 | 45.5±0.5 | -0.02±0.60 | 41.2±0.2 | 0.59±0.26  | 49.1±0.1 | 0.63±0.47  |
|                                    | KF-MEE   | 47.5±0.2 | 0.45±0.40  | 56.1±0.2 | 0.56±1.05 | 44.3±0.5 | 0.19±0.64  | 41.0±0.2 | 0.74±0.31  | 49.2±0.2 | 0.63±0.47  |
|                                    | KF-OMI   | 48.1±0.2 | 0.13±0.46  | 56.0±0.1 | 0.15±1.15 | 46.7±0.5 | -0.16±0.74 | 42.3±0.2 | 0.29±0.31  | 48.1±0.1 | 0.48±0.43  |

**Table. S2.** Averages (with units ppb or DU) and trends (with units ppb yr<sup>-1</sup> or DU yr<sup>-1</sup>) of surface and tropospheric column O<sub>3</sub> concentrations in 2015-2020 over Yangtze River Delta (Region #2) from observations (MEE and OMI) and a priori and a posteriori (KF) simulations. Grids with low and medium anthropogenic NO<sub>x</sub> emissions are excluded in Yangtze River Delta.



| #3 Central China<br>(2015-2020)      |          | Annual   |            | Spring   |            | Summer   |            | Autumn   |            | Winter   |            |
|--------------------------------------|----------|----------|------------|----------|------------|----------|------------|----------|------------|----------|------------|
|                                      |          | Mean     | Trend      |
| TS3.1 surface<br>(sampled)           | MEE      | 43.5±0.4 | 1.90±0.44  | 48.8±0.8 | 2.53±0.56  | 52.6±0.9 | 1.89±1.35  | 45.4±0.4 | 2.54±1.12  | 28.0±0.6 | 0.52±0.78  |
|                                      | a priori | 45.1±0.2 | 0.44±0.29  | 50.3±0.3 | 0.61±0.21  | 59.8±0.5 | 0.04±0.85  | 44.3±0.4 | 0.83±0.40  | 26.4±0.3 | 0.49±0.24  |
|                                      | KF-MEE   | 43.1±0.4 | 1.55±0.38  | 47.8±0.4 | 2.07±0.42  | 53.0±0.5 | 1.51±1.20  | 44.7±0.4 | 2.09±0.89  | 27.8±0.4 | 0.47±0.63  |
| TS3.2<br>surface                     | a priori | 45.3±0.1 | 0.45±0.28  | 50.6±0.1 | 0.61±0.19  | 59.6±0.4 | 0.01±0.82  | 44.3±0.2 | 0.83±0.38  | 27.0±0.2 | 0.53±0.23  |
|                                      | KF-MEE   | 43.3±0.2 | 1.33±0.34  | 48.0±0.2 | 1.72±0.34  | 53.4±0.5 | 1.16±1.05  | 44.2±0.2 | 1.83±0.72  | 28.2±0.2 | 0.63±0.42  |
| TS3.3<br>trop. column<br>(convolved) | OMI      | 47.4±0.2 | -0.60±0.20 | 54.4±0.2 | -0.36±0.31 | 50.7±0.3 | -0.66±0.59 | 42.8±0.2 | -0.94±0.40 | 40.8±0.2 | -0.60±0.40 |
|                                      | a priori | 45.2±0.1 | -0.08±0.27 | 53.5±0.3 | 0.05±0.19  | 47.7±0.4 | -0.20±0.52 | 39.8±0.2 | 0.10±0.34  | 39.4±0.3 | -0.19±0.45 |
|                                      | KF-OMI   | 46.2±0.1 | -0.37±0.26 | 53.6±0.2 | -0.20±0.30 | 50.0±0.4 | -0.51±0.55 | 41.8±0.2 | -0.47±0.34 | 39.1±0.3 | -0.33±0.38 |
| TS3.4<br>trop. Column                | a priori | 48.2±0.1 | 0.11±0.41  | 56.8±0.2 | 0.33±0.72  | 46.0±0.3 | -0.34±0.56 | 41.0±0.1 | 0.36±0.41  | 49.3±0.1 | 0.12±0.49  |
|                                      | KF-MEE   | 47.4±0.1 | 0.32±0.43  | 55.9±0.2 | 0.62±0.72  | 44.5±0.3 | -0.06±0.59 | 40.5±0.2 | 0.58±0.49  | 49.2±0.1 | 0.15±0.49  |
|                                      | KF-OMI   | 48.1±0.1 | -0.06±0.48 | 55.7±0.1 | 0.15±0.85  | 47.0±0.4 | -0.51±0.69 | 42.1±0.1 | 0.06±0.42  | 48.2±0.1 | 0.00±0.44  |

**Table. S3.** Averages (with units ppb or DU) and trends (with units ppb yr<sup>-1</sup> or DU yr<sup>-1</sup>) of surface and tropospheric column O<sub>3</sub> concentrations in 2015-2020 over Central China (Region #3) from observations (MEE and OMI) and a priori and a posteriori (KF) simulations.

| #4 Sichuan Basin<br>(2015-2020)      |          | Annual   |            | Spring   |           | Summer   |            | Autumn   |            | Winter   |            |
|--------------------------------------|----------|----------|------------|----------|-----------|----------|------------|----------|------------|----------|------------|
|                                      |          | Mean     | Trend      | Mean     | Trend     | Mean     | Trend      | Mean     | Trend      | Mean     | Trend      |
| TS4.1 surface<br>(sampled)           | MEE      | 36.9±0.9 | 1.13±0.25  | 45.1±1.2 | 2.27±0.54 | 50.7±1.5 | 0.95±0.67  | 29.2±0.8 | 0.50±0.35  | 23.4±0.7 | 0.59±0.47  |
|                                      | a priori | 45.7±0.5 | -0.18±0.13 | 51.5±0.4 | 0.06±0.29 | 60.0±1.0 | -0.83±0.43 | 42.0±0.3 | -0.10±0.19 | 29.5±0.3 | 0.30±0.12  |
|                                      | KF-MEE   | 37.5±0.6 | 0.77±0.20  | 44.4±1.0 | 1.69±0.43 | 50.3±1.2 | 0.54±0.56  | 31.7±0.4 | 0.32±0.25  | 24.5±0.5 | 0.45±0.37  |
| TS4.2<br>surface                     | a priori | 44.6±0.2 | -0.16±0.17 | 50.4±0.2 | 0.10±0.20 | 54.9±0.6 | -0.75±0.54 | 41.8±0.1 | -0.06±0.19 | 31.4±0.3 | 0.25±0.14  |
|                                      | KF-MEE   | 39.1±0.2 | 0.38±0.18  | 44.9±0.3 | 0.99±0.22 | 47.3±0.5 | -0.04±0.57 | 35.7±0.3 | 0.25±0.25  | 28.9±0.4 | 0.28±0.27  |
| TS4.3<br>trop. column<br>(convolved) | OMI      | 42.6±0.3 | -0.39±0.32 | 47.7±0.4 | 0.30±0.56 | 46.3±0.3 | -0.59±0.54 | 37.5±0.3 | -0.66±0.40 | 38.7±0.4 | -1.08±0.79 |
|                                      | a priori | 42.6±0.3 | 0.03±0.29  | 51.3±0.4 | 0.23±0.60 | 44.7±0.3 | -0.30±0.43 | 36.0±0.3 | 0.31±0.30  | 38.2±0.4 | -0.26±0.31 |
|                                      | KF-OMI   | 42.9±0.3 | -0.23±0.31 | 49.6±0.4 | 0.05±0.42 | 46.3±0.3 | -0.45±0.61 | 37.5±0.3 | -0.31±0.31 | 37.7±0.4 | -0.51±0.46 |
| TS4.4<br>trop. Column                | a priori | 44.9±0.2 | -0.12±0.36 | 53.5±0.3 | 0.26±0.65 | 42.6±0.3 | -0.67±0.33 | 36.7±0.2 | -0.06±0.30 | 47.3±0.2 | -0.16±0.61 |
|                                      | KF-MEE   | 43.8±0.2 | 0.03±0.38  | 52.3±0.3 | 0.47±0.66 | 41.0±0.3 | -0.46±0.35 | 35.4±0.2 | 0.03±0.32  | 46.7±0.2 | -0.13±0.60 |
|                                      | KF-OMI   | 44.6±0.2 | -0.29±0.42 | 51.6±0.3 | 0.04±0.75 | 43.4±0.3 | -0.89±0.43 | 37.8±0.2 | -0.33±0.28 | 46.0±0.2 | -0.23±0.55 |

**Table. S4.** Averages (with units ppb or DU) and trends (with units ppb yr<sup>-1</sup> or DU yr<sup>-1</sup>) of surface and tropospheric column O<sub>3</sub> concentrations in 2015-2020 over Sichuan Basin (Region #4) from observations (MEE and OMI) and a priori and a posteriori (KF) simulations.

| #5 Southern China<br>(2015-2020)     |          | Annual   |            | Spring   |            | Summer   |            | Autumn   |            | Winter   |            |
|--------------------------------------|----------|----------|------------|----------|------------|----------|------------|----------|------------|----------|------------|
|                                      |          | Mean     | Trend      |
| TS5.1 surface<br>(sampled)           | MEE      | 38.3±0.5 | 1.44±0.40  | 37.8±0.5 | 1.50±0.84  | 38.5±0.6 | 0.79±0.68  | 44.9±0.7 | 2.85±1.45  | 33.2±0.7 | 1.85±1.39  |
|                                      | a priori | 43.2±0.3 | -0.02±0.29 | 47.5±0.3 | -0.03±0.34 | 43.7±0.6 | -1.01±0.77 | 46.1±0.5 | 0.66±0.58  | 35.8±0.6 | 0.83±0.48  |
|                                      | KF-MEE   | 39.2±0.4 | 0.97±0.35  | 39.9±0.4 | 0.93±0.67  | 39.5±0.6 | 0.23±0.66  | 44.7±0.6 | 2.21±1.20  | 33.5±0.6 | 1.49±1.05  |
| TS5.2<br>surface                     | a priori | 42.2±0.1 | -0.07±0.26 | 47.0±0.1 | -0.06±0.30 | 42.4±0.3 | -0.99±0.77 | 44.7±0.2 | 0.63±0.54  | 34.9±0.3 | 0.68±0.51  |
|                                      | KF-MEE   | 39.0±0.2 | 0.58±0.29  | 41.4±0.2 | 0.58±0.50  | 38.8±0.2 | -0.19±0.64 | 42.9±0.3 | 1.65±0.94  | 33.4±0.2 | 0.95±0.83  |
| TS5.3<br>trop. column<br>(convolved) | OMI      | 41.3±0.1 | -0.23±0.32 | 49.1±0.1 | 0.07±0.44  | 41.5±0.1 | -0.38±0.77 | 37.4±0.1 | -0.09±0.48 | 36.9±0.2 | -0.64±0.42 |
|                                      | a priori | 39.7±0.2 | 0.03±0.33  | 49.5±0.2 | 0.01±0.55  | 35.9±0.2 | -0.09±0.66 | 32.8±0.1 | 0.18±0.50  | 40.3±0.1 | -0.36±0.32 |
|                                      | KF-OMI   | 41.3±0.1 | -0.19±0.32 | 49.3±0.1 | -0.09±0.43 | 40.3±0.1 | -0.33±0.76 | 36.9±0.1 | -0.14±0.47 | 38.5±0.1 | -0.50±0.32 |
| TS5.4<br>trop. Column                | a priori | 40.3±0.2 | -0.07±0.33 | 49.7±0.2 | -0.20±0.55 | 35.2±0.2 | -0.18±0.40 | 34.1±0.1 | 0.27±0.55  | 42.0±0.2 | -0.46±0.39 |
|                                      | KF-MEE   | 39.6±0.1 | 0.06±0.32  | 48.7±0.2 | -0.09±0.57 | 34.4±0.1 | -0.01±0.37 | 33.6±0.1 | 0.45±0.60  | 41.7±0.2 | -0.41±0.37 |
|                                      | KF-OMI   | 40.6±0.1 | -0.25±0.33 | 48.6±0.1 | -0.32±0.53 | 36.7±0.1 | -0.35±0.44 | 36.2±0.1 | -0.05±0.59 | 40.8±0.1 | -0.61±0.43 |

**Table. S5.** Averages (with units ppb or DU) and trends (with units ppb yr<sup>-1</sup> or DU yr<sup>-1</sup>) of surface and tropospheric column O<sub>3</sub> concentrations in 2015-2020 over Southern China (Region #5) from observations (MEE and OMI) and a priori and a posteriori (KF) simulations.
